# Supplementary material
Source: Research Square preprint supplement (doi:10.21203/rs.3.rs-9756290/v1)
Supplement: Supplementary file 1 [file 6d3ccc453d02996e910301bf.docx]

# **Supplementary Material 1**

# Topic guide: Health data research and the public interest – a qualitative study of data access committees in New Zealand, Singapore, the UK and the US

| **Introduction** | |
| --- | --- |
| - **Explaining the purpose of the interview**   *“Thank you for participating in our research. The aim of this project is to gain insights into practices of reviewing whether requests to use data stored on a government funded platform are in the public interest (i.e. applying the public interest criterion), and the considerations underlying those practices.*  *We are interviewing people who are part of committees or on boards that are tasked with applying the public interest criterion. We are interviewing individuals working in Australia, New Zealand, Singapore, the UK or the US. The results of these interviews will serve as input for recommendations on how to apply the public interest criterion in practice. They are also planned to be published in an academic journal.*  *I want to ask for your permission to record the interview for analysis purposes. The recordings are for internal use only and will be deleted once we finish the analysis.*  *The transcript of this interview and any quotes from the interview that might be used in a future publication will be anonymized. Please feel free to let me know if you do not want to answer a question, have any questions for me or want to end the interview early.”*   - Discuss with interviewees if they have any questions or comments before the interview begins. | 5 min. |
| **Topic 1. In general: The role of the data access committee (DAC) and of the interviewee within the DAC** | |
| To discuss:   - The purpose of the data access committee (DAC) that they are a member of, e.g. the main task of the DAC, the kind of research access requests that they review. - The review process of the committee, e.g. those who are involved in the review process, how often the DAC comes together and topics discussed during DAC meetings. This topic can be briefly discussed if already previously discussed with interviewees from the same DAC. - The specific role of the interviewee in the DAC, e.g. whether the interviewee has different responsibilities compared to others in the committee, why they decided to join the DAC, examples of things they changed in the review process of the committee. | 10 min. |
| **Topic 2. Current practices of applying the public interest criterion** | |
| To discuss:   - The current practice within the DAC of reviewing data access requests based on the public interest criterion, e.g. the way in which public interest is defined by the DAC (officially and/ or in practice), whether the DAC use particular guidelines/frameworks to apply the criterion, considerations that typically come up when applying the public interest criterion, record keeping of outcomes of the review process (e.g. whether records are kept internally or published publicly), the role of the public interest criterion in relation to other selection criteria. - Research that is not in the public interest according to the DAC and/or the interviewee, e.g. data access requests rejected by the DAC based on a lack of public interest, requests that were approved by the DAC but should have been rejected according to the interviewee and vice versa. - Challenges when assessing whether research is in the public interest, e.g. disagreement within the DAC, borderline cases, lack of evidence. - Lessons learned from applying the public interest criterion in practice, e.g. whether they would like to change things about the way they/ the DAC is applying the public interest criterion (in the future). - Involving external stakeholders in the judgement of public interest, e.g. whether external stakeholders are involved in the public interest review process, who are they, and how, when and why are they being involved. | 20 min. |
| **Topic 3. The public interest of hypothetical research access requests** | |
| To discuss:   - Limits to what type of research should qualify as being in the public interest on the basis of one or two examples of hypothetical data access requests. This may include questions about whether the DAC of interest would review data access requests similar to the one described in the hypothetical example, and the considerations that are most important to the interviewee when deciding on whether the research is in the public interest.   The hypothetical data access request:  **Title: Genomic data use by Ministry of Education/ Department of Education to predict education attainment.**  Organisation requesting data: Ministry of Education (Singapore)/ Department of Education (UK/US).  Data requested: Genomic data stored on the platform to link with the ministry’s/department’s own educational data.  Purpose: Predict educational attainment based on genomic data to better target educational programmes for children. Prior research showed that genomic information can explain about 12-16% of the variance in educational attainment. [[1]](#endnote-1) It is estimated that around half of these prediction levels can be explained by genomic information directly, and the other half by indirect effects of the parents’ genomics on their child’s education. The prediction levels are not able to predict how far one particular person goes in education, but they are considered to be valuable tools in population-level research. | 20 min. |
| **Concluding remarks** |  |
| To discuss:   - Something left undiscussed that the interviewee would like to mention. - Questions of the interviewee.   Thank interviewee again for their time and effort. | 5 min. |

1. Okbay, A., Wu, Y., Wang, N., Jayashankar, H., Bennett, M., Nehzati, S. M., ... & Esko, T. (2022). Polygenic prediction of educational attainment within and between families from genome-wide association analyses in 3 million individuals. Nature genetics, 54(4), 437-449. [↑](#endnote-ref-1)
